# Supplementary material for: Assessing Time in Range with Postprandial Glucose-Focused Titration of Ultra Rapid Lispro (URLi) in People with Type 1 Diabetes
Source: PubMed Central journal article supplement — Diabetes Ther. 2023 Sep 23;14(11):1933–45. doi: 10.1007/s13300-023-01476-4 (PMC10570246; doi:10.1007/s13300-023-01476-4), 2023-09-23
Supplement: 13300_2023_1476_MOESM1_ESM.pdf [file 13300_2023_1476_MOESM1_ESM.pdf]

## Supplementary Material

### Assessing Time in Range with Postprandial Glucose-Focused Titration of Ultra Rapid Lispro (URLi) in People with Type 1 Diabetes

#### Authors

Richard M. Bergenstal,<sup>1</sup> Bruce W. Bode,<sup>2</sup> Anuj Bhargava,<sup>3</sup> Qianqian Wang,<sup>4</sup> Alastair W. Knights,<sup>4</sup> Annette M. Chang<sup>4</sup>

<sup>1</sup>*International Diabetes Center, HealthPartners Institute, Minneapolis, MN, USA*

<sup>2</sup>*Atlanta Diabetes Associates Hospital, Atlanta, GA, USA*

<sup>3</sup>*Iowa Diabetes and Endocrinology Research Center, West Des Moines, IA, USA*

<sup>4</sup>*Eli Lilly and Company, Indianapolis, IN, USA*

#### Corresponding Author

Richard M. Bergenstal

[richard.bergenstal@parknicollet.com](mailto:richard.bergenstal@parknicollet.com)

## **Table of Contents**

**Table S1 Target glucose values for adjustment of insulin dosing**

**Table S2 Proportion of participants achieving recommended CGM targets**

**Table S3 Insulin-to-carbohydrate ratio**

**Table S4 Product of insulin-to-carbohydrate ratio and total daily dose**

**Table S5 Glucose variability**

**Table S6 Insulin sensitivity factor**

**Fig. S1** Median and percentile hourly ambulatory glucose profiles over 24 h during the Lispro lead-in and URLi maintenance period (endpoint).

**Fig. S2** Median and percentile hourly ambulatory glucose profiles 0-4 h postmeal during the Lispro lead-in and URLi maintenance period (endpoint).

**Table S1 Target glucose values for adjustment of insulin dosing**

| <b>Time of target glucose measurement</b>                                                     | <b>Glucose target (range)</b>                  |
|-----------------------------------------------------------------------------------------------|------------------------------------------------|
| Fasting glucose                                                                               | 100 mg/dL (range 80-110 mg/dL)                 |
| Overnight glucose excursion (the difference between bedtime and pre-breakfast glucose levels) | $\leq \pm 30$ mg/dL                            |
| Postprandial glucose peak                                                                     | <140 mg/dL or <20% increase from premeal level |

Targets were based on those recommended by the American Association of Clinical Endocrinologists (AACE). (16)

**Table S2 Proportion of participants achieving recommended CGM targets**

|                                                                   | <b>Lispro lead-in period, n (%)</b> | <b>URLi maintenance period, n (%)</b> |
|-------------------------------------------------------------------|-------------------------------------|---------------------------------------|
| >70% of time with glucose values within target range 70-180 mg/dL | 13 (41.9)                           | 14 (45.2)                             |
| <1% of time with glucose values in hypoglycemic range <54 mg/dL   | 30 (96.8)                           | 29 (93.5)                             |
| <5% of time with glucose values in hyperglycemic range >250 mg/dL | 13 (41.9)                           | 17 (54.8)                             |

n=31. CGM, continuous glucose monitoring; n, number of participants in the analysis population; URLi, ultra rapid lispro.

**Table S3 Insulin-to-carbohydrate ratio**

| <b>Meal</b>        | <b>n</b> | <b>Lispro lead-in, mean (SD)</b> | <b>URLi endpoint, mean (SD)</b> | <b>Change from baseline, LSM (SE)</b> | <b>P-value</b> |
|--------------------|----------|----------------------------------|---------------------------------|---------------------------------------|----------------|
| Breakfast (g/U)    | 30       | 9.69 (3.59)                      | 9.03 (3.49)                     | -0.67 (0.19)                          | 0.002          |
| Lunch (g/U)        | 31       | 9.58 (3.53)                      | 9.07 (3.42)                     | -0.51 (0.36)                          | 0.169          |
| Dinner (g/U)       | 31       | 9.42 (3.33)                      | 9.11 (3.53)                     | -0.31 (0.35)                          | 0.377          |
| Across meals (g/U) | 31       | 9.52 (3.47)                      | 9.05 (3.40)                     | -0.47 (0.24)                          | 0.057          |

LSM, least squares mean; n, number of participants in analysis population; SD, standard deviation; SE, standard error; URLi, ultra rapid lispro.

**Table S4 Product of insulin-to-carbohydrate ratio and total daily dose**

| <b>Product of ICR (g/U) and TDD (U/day)</b> | <b>n</b> | <b>Lispro lead-in period</b> | <b>URLi maintenance period</b> |
|---------------------------------------------|----------|------------------------------|--------------------------------|
| Breakfast                                   | 27       | 408.6 (174.3)                | 411.1 (169.8)                  |
| Lunch                                       | 28       | 406.2 (172.3)                | 421.3 (184.2)                  |
| Dinner                                      | 28       | 402.0 (175.4)                | 427.6 (207.0)                  |
| Average of three meals                      | 28       | 403.9 (178.9)                | 420.0 (183.5)                  |

Data are mean (standard deviation). ICR, insulin-to-carbohydrate ratio; n, number of participants in the analysis population; TDD, total daily dose; URLi, ultra rapid lispro.

**Table S5 Glucose variability**

| <b>Time period</b>                             | <b>Lispro lead-in, mean (SD)</b> | <b>URLi maintenance period, mean (SD)</b> | <b>Change from Baseline, LSM (SE)</b> | <b>P-value</b> |
|------------------------------------------------|----------------------------------|-------------------------------------------|---------------------------------------|----------------|
| <b>Coefficient of variation for glucose, %</b> |                                  |                                           |                                       |                |
| 24-h period                                    | 30.72 (4.18)                     | 29.18 (4.49)                              | -1.55 (0.56)                          | 0.010          |
| Daytime                                        | 30.74 (4.08)                     | 29.24 (4.96)                              | -1.50 (0.64)                          | 0.026          |
| Nighttime                                      | 17.13 (5.31)                     | 15.52 (4.41)                              | -1.61 (0.62)                          | 0.015          |

n=31. LSM, least squares mean; n, number of participants in the analysis population; URLi, ultra rapid lispro.

**Table S6 Insulin sensitivity factor**

| <b>Time point</b> | <b>Lispro lead-in Mean (SD)</b> | <b>URLi maintenance period Mean (SD)</b> | <b>Change from baseline, LSM (SE)</b> | <b>P-value</b> |
|-------------------|---------------------------------|------------------------------------------|---------------------------------------|----------------|
| Breakfast         | 39.6 (14.8)                     | 38.3 (12.9)                              | -1.3 (1.5)                            | 0.393          |
| Lunch             | 39.6 (14.5)                     | 38.8 (12.8)                              | -0.8 (1.5)                            | 0.578          |
| Dinner            | 40.3 (14.7)                     | 39.1 (12.5)                              | -1.2 (1.6)                            | 0.479          |
| Across meals      | 39.9 (14.6)                     | 38.7 (12.6)                              | -1.1 (1.5)                            | 0.445          |

n=31. LSM, least squares mean; n, number of participants in analysis population; SD, standard deviation; SE, standard error; URLi, ultra rapid lispro.

**Fig. S1** Median and percentile hourly ambulatory glucose profiles over 24 h during the Lispro lead-in and URLi maintenance period (endpoint).

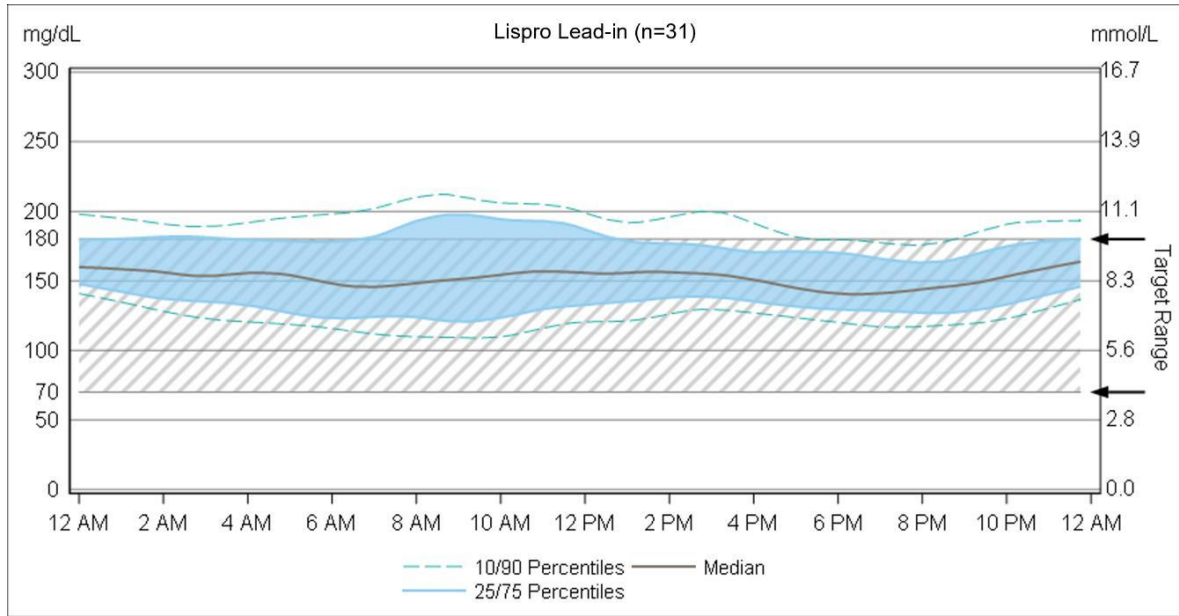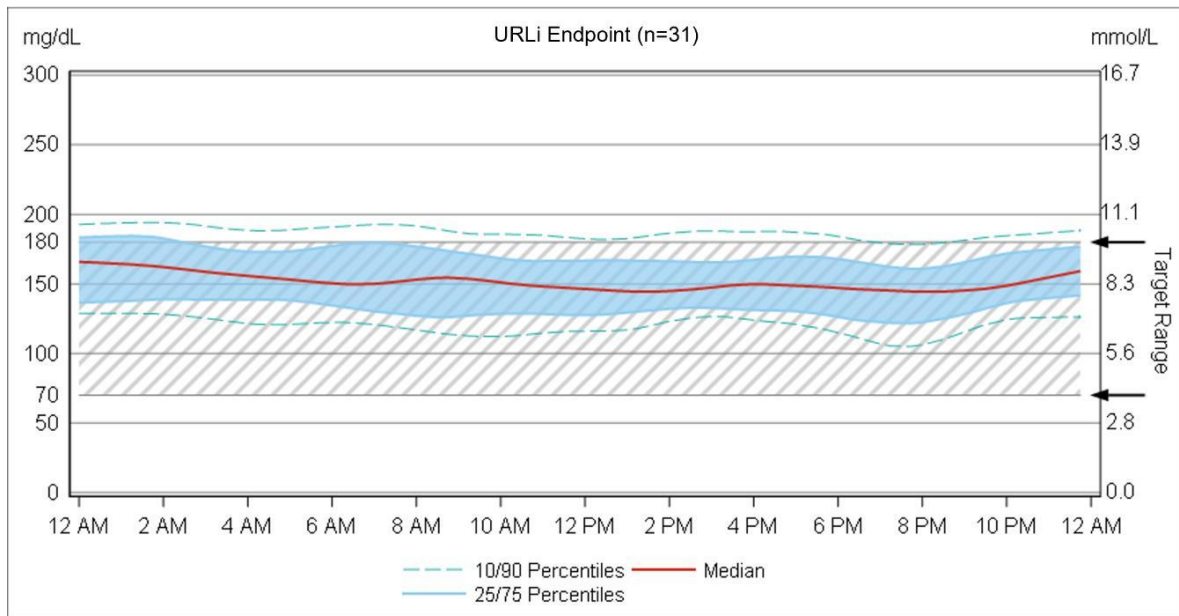

URLi, ultra rapid lispro.

**Fig. S2** Median and percentile hourly ambulatory glucose profiles 0-4 h postmeal during the Lispro lead-in and URLi maintenance period (endpoint).

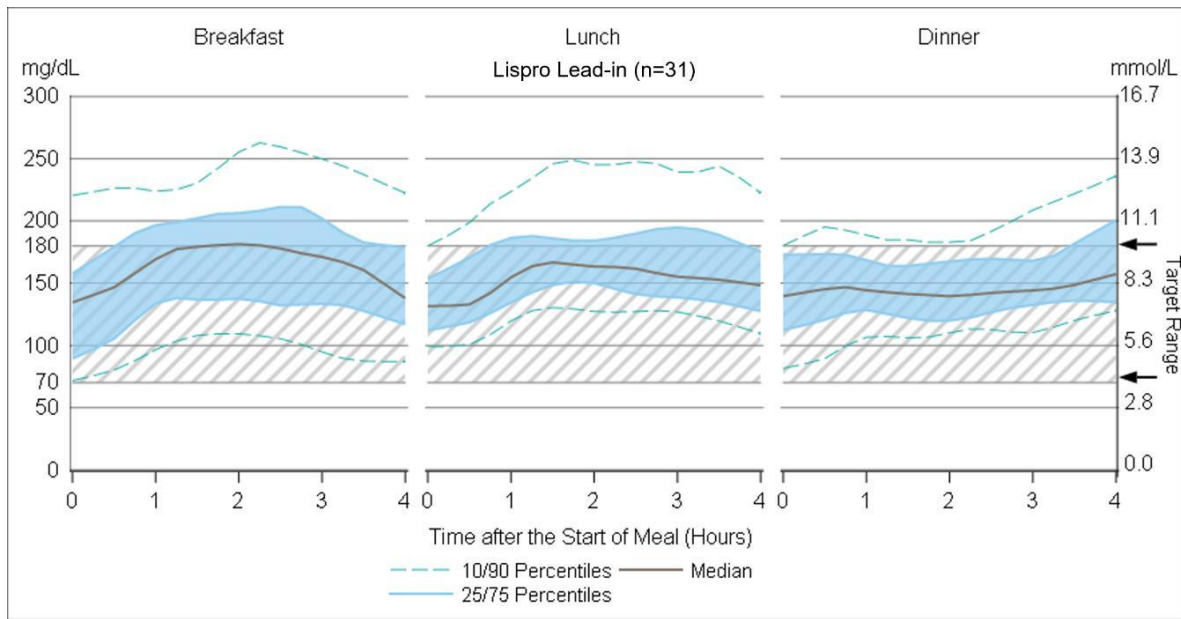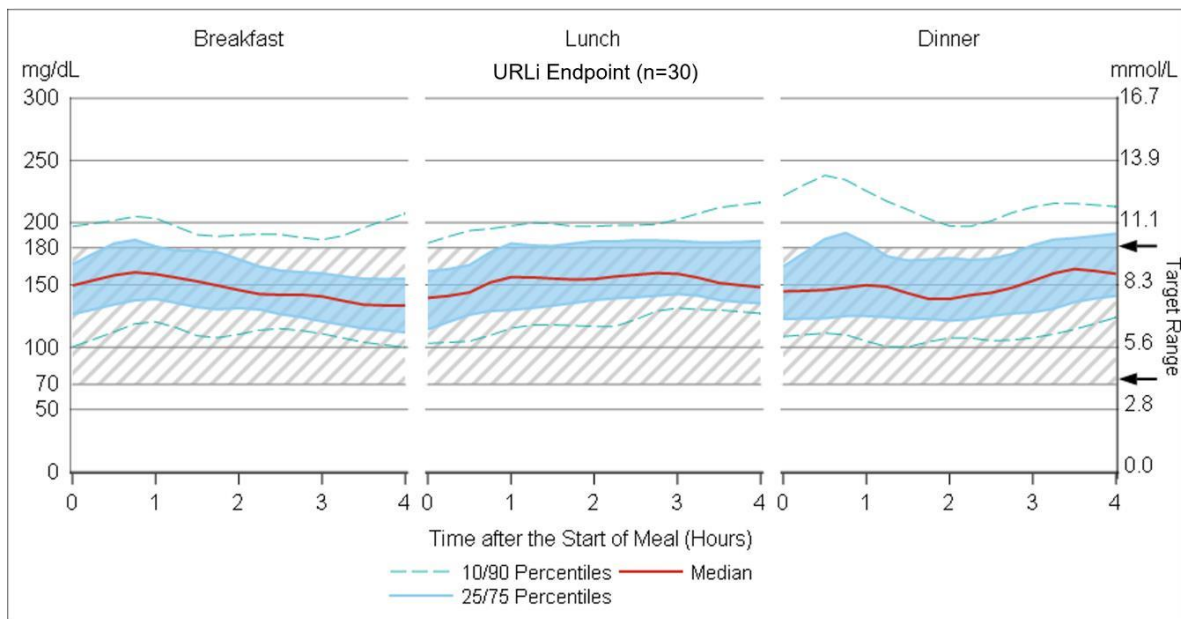

URLi, ultra rapid lispro.
